# Supplementary material
Source: PubMed Central journal article supplement (PMC6034641)
Supplement: blood814244-suppl1.pdf [file blood814244-suppl1.pdf]

## **Supplementary Methods**

### *Research-Based Whole Exome Sequencing*

Whole exome sequencing was performed at the Human Genome sequencing center (HGSC) at Baylor College of Medicine through the Baylor-Hopkins Center for Mendelian Genomics (CMG) initiative. Using 1  $\mu$ g of DNA, an Illumina paired-end pre-capture library was constructed according to the manufacturer's protocol (Illumina Multiplexing\_SamplePrep\_Guide\_1005361\_D) with modifications as described in the *BCM-HGSC Illumina Barcoded Paired-End Capture Library Preparation* protocol. Pre-capture libraries were pooled into 4-plex library pools and then hybridized in solution to the HGSC-designed Core capture reagent<sup>1</sup> (52 Mb, NimbleGen), or 6-plex library pools used the custom VCRome 2.1 capture reagent<sup>1</sup> (42 Mb, NimbleGen) according to the manufacturer's protocol (*NimbleGen SeqCap EZ Exome Library SR User's Guide*) with minor revisions. The sequencing run was performed in paired-end mode using the Illumina HiSeq 2000 platform, with sequencing-by-synthesis reactions extended for 101 cycles from each end and an additional 7 cycles for the index read. With a sequencing yield of 9.1 Gb, the sample achieved 91% of the targeted exome bases covered to a depth of 20X or greater. Illumina sequence analysis was performed using the HGSC Mercury analysis pipeline (<https://www.hgsc.bcm.edu/software/mercury>)<sup>2,3</sup>, which moves data through various analysis tools from the initial sequence generation on the instrument to annotated variant calls (SNPs and intra-read in/dels).

### *Computational Analyses of Potential Digenic fHLH Gene Variants and Dysregulated Immune Activation and Proliferation-Associated Genes*

For multilocus variation/mutational burden or “digenic” inheritance analysis, for each two-gene combination of fHLH genes *PRF1*, *STX11*, *STXBP2*, and *UNC13D* together with *LYST* and *RAB27A*, the number of alleles containing potential protein-altering variants (frameshift insertions/deletions, stopgain/stoploss, splicing defects, non-frameshift insertions/deletions, and missense variants) in HLH affected cases ( $n = 48$ ) was compared to the number in other samples in the Baylor-Hopkins CMG database (total  $n = 6,677$ ; analyzed  $n = 5,981$ ), excluding unaffected relatives in the HLH cohort ( $n = 51$ ) and individuals in the “Immunodeficiency” cohort ( $n = 645$ ). The Baylor-Hopkins CMG database contains exomes from well-phenotyped diseased and healthy individuals (recorded within the PhenoDB database)<sup>4</sup> collected among over 380 phenotypic cohorts. Variants were excluded from this analysis if less than 5 variant reads were observed or if present in homozygous state. For each gene combination, the allele count was increased by 1 if a variant was present in both genes within the exome examined. It was not increased if the exome had no variants in either gene or if it had a variant in only one gene in the gene combination.

For the DIAP gene variant analysis, the number of alleles containing potential protein-altering variants (frameshift insertions/deletions, stopgain/stoploss, splicing defects, non-frameshift insertions/deletions, and missense variants) in *NLRC4*, *NLRP12*, *NLRP4*, *NLRP13*, and *NLRC3* in HLH affected cases ( $n = 48$ ) was compared to the number in other samples in the Baylor-Hopkins CMG database (total  $n = 6,677$ ; analyzed  $n = 5,981$ ), excluding unaffected relatives in the HLH cohort ( $n = 51$ ) and individuals in the “Immunodeficiency” cohort ( $n = 645$ ). The Baylor-Hopkins CMG

database contains exomes from well-phenotyped diseased and healthy individuals (recorded within the PhenoDB database)<sup>4</sup> collected among over 380 phenotypic cohorts. For all analyses, variants were excluded if less than 5 variant reads were observed. For dominant model testing, variants were included for analysis if present in heterozygous state and observed at an allelic frequency of less than or equal to 0.0002 in the Baylor-Hopkins CMG database. For recessive model testing, variants were included for analysis if present in compound heterozygous or homozygous state and observed at an allelic frequency of less than or equal to 0.005 in the Baylor-Hopkins CMG database.

We then performed random sampling without replacement (bootstrapping method) to test the significance of differences in allelic counts between cases and controls. For both analyses, the allele counts in cases and controls were permuted for 100,000 iterations for each gene combination or DIAP-associated gene, and a *p*-value was calculated for the difference in allele counts in cases vs. controls.

---

**Table S1. Diagnostic criteria for HLH used in the HLH-2004 trial.<sup>5</sup>**

1. Fever  $\geq 38.5^{\circ}\text{C}$
2. Splenomegaly
3. Cytopenias (affecting at least 2 of 3 lineages in the peripheral blood)  
*Hemoglobin*  $< 9 \text{ g/dL}$  (in infants  $< 4$  weeks: hemoglobin  $< 10 \text{ g/dL}$ )  
*Platelets*  $< 100 \times 10^3/\text{ml}$   
*Neutrophils*  $< 1 \times 10^3/\text{ml}$
4. Hypertriglyceridemia (fasting,  $> 265 \text{ mg/dl}$ ) and/or hypofibrinogenemia ( $< 150 \text{ mg/dL}$ )
5. Hemophagocytosis in bone marrow, spleen, lymph nodes, or liver
6. Low or absent NK cell activity
7. Ferritin  $> 500 \text{ ng/ml}$
8. Elevated sCD25 ( $> 2$  standard deviations above mean)

---

Abbreviations: NK, natural killer

| ID      | Gene          | Chromosomal coordinates (hg19) | Zygoty | Mutation type   | Reference sequence and effect            | CMG <sup>a</sup> | ExAC <sup>b</sup> | CADD <sup>c</sup> | Candidate(s) <sup>d</sup> | P <sup>e</sup> |
|---------|---------------|--------------------------------|--------|-----------------|------------------------------------------|------------------|-------------------|-------------------|---------------------------|----------------|
| HLH_002 | <i>LYST</i>   | 1:235826382_TA>T               | Het    | Splicing defect | NM_000081:exon54:<br>c.11268-5delT       | 0.24             | 0.51              | N/A               | <i>NLR3</i>               | N/A            |
| HLH_004 | <i>LYST</i>   | 1:235826382_TA>T               | Het    | Splicing defect | NM_000081:exon54:<br>c.11268-5delT       | 0.24             | 0.51              | N/A               | <i>NLR3</i>               | N/A            |
| HLH_005 | <i>LYST</i>   | 1:235826382_TA>T               | Het    | Splicing defect | NM_000081:exon54:<br>c.11268-5delT       | 0.24             | 0.51              | N/A               | <i>NLRP4</i>              | N/A            |
|         | <i>STXBP2</i> | 19:7705300_A>ATG               | Het    | Intronic        | N/A                                      | 0.02             | 0.34              | N/A               |                           |                |
| HLH_006 | <i>LYST</i>   | 1:235826382_TA>T               | Het    | Splicing defect | NM_000081:exon54:<br>c.11268-5delT       | 0.24             | 0.51              | N/A               |                           | N/A            |
| HLH_007 | <i>STXBP2</i> | 19:7704894_GTGTC>G             | Het    | Intronic        | N/A                                      | 0.003            | 0.005             | N/A               | <i>NRAS</i>               |                |
| HLH_008 | <i>LYST</i>   | 1:235826382_TA>T               | Het    | Splicing defect | NM_000081:exon54:<br>c.11268-5delT       | 0.24             | 0.51              | N/A               | <i>NLRP4</i>              | N/A            |
| HLH_014 | <i>LYST</i>   | 1:235826382_TA>T               | Het    | Splicing defect | NM_000081:exon54:<br>c.11268-5delT       | 0.24             | 0.51              | N/A               |                           | NS             |
|         | <i>UNC13D</i> | 17:73826146_T>C                | Het    | Missense        | NM_199242:exon30:<br>c.2917A>G;p.K973E   | 0.0002           | 0.0003            | 22.4              |                           |                |
| HLH_016 | <i>LYST</i>   | 1:235856663_G>A                | Het    | Missense        | NM_000081:exon47:<br>c.10688C>T;p.S3563L | 0.00008          | 0.00002           | 26                |                           | NS             |
|         | <i>PRF1</i>   | 10:72358822_A>T                | Het    | Missense        | NM_001083116:exon3:<br>c.655T>A;p.Y219N  | 0.00008          | 0                 | 26.8              |                           |                |
|         | <i>STXBP2</i> | 19:7705383_CATCTGTGTGTGTGT>C   | Het    | Intronic        | N/A                                      | 0.03             | 0.04              | N/A               |                           |                |
| HLH_017 | <i>LYST</i>   | 1:235826382_TA>T               | Het    | Splicing defect | NM_000081:exon54:<br>c.11268-5delT       | 0.24             | 0.51              | N/A               |                           | NS             |
|         | <i>UNC13D</i> | 17:73826167_G>A                | Het    | Missense        | NM_199242:exon30:<br>c.2896C>T;p.R966W   | 0.003            | 0.01              | 7                 |                           |                |
| HLH_024 | <i>RAB27A</i> | 15:55520906_G>A                | Hom    | Missense        | NM_183236:exon5:<br>c.244C>T;p.R82C      | 0.00008          | 0.000008          | 34                | <i>RAB27A</i>             | N/A            |
| HLH_040 | <i>LYST</i>   | 1:235826382_TA>T               | Het    | Splicing defect | NM_000081:exon54:<br>c.11268-5delT       | 0.24             | 0.51              | N/A               |                           | N/A            |
| HLH_043 | <i>STXBP2</i> | 19:7705300_A>ATG               | Het    | Intronic        | N/A                                      | 0.02             | 0.34              | N/A               |                           | N/A            |
| HLH_050 | <i>LYST</i>   | 1:235826382_TA>T               | Het    | Splicing defect | NM_000081:exon54:<br>c.11268-5delT       | 0.24             | 0.51              | N/A               |                           | N/A            |
|         | <i>STXBP2</i> | 19:7705383_CATCTGTGTGTGTGT>C   | Het    | Intronic        | N/A                                      | 0.03             | 0.04              | N/A               |                           |                |
| HLH_057 | <i>LYST</i>   | 1:235826382_TA>T               | Het    | Splicing defect | NM_000081:exon54:<br>c.11268-5delT       | 0.24             | 0.51              | N/A               |                           | N/A            |
|         | <i>STXBP2</i> | 19:7705461_C>A                 | Het    | Intronic        | N/A                                      | 0.002            | 0.0009            | 4.3               |                           |                |
|         | <i>STXBP2</i> | 19:7705487_T>G                 | Het    | Intronic        | N/A                                      | 0.002            | 0.007             | 0.3               |                           |                |
|         | <i>STXBP2</i> | 19:7705502_T>A                 | Het    | Intronic        | N/A                                      | 0.002            | 0.007             | 1.3               |                           |                |

|                |                |                      |     |                 |                                           |         |         |      |                                      |      |
|----------------|----------------|----------------------|-----|-----------------|-------------------------------------------|---------|---------|------|--------------------------------------|------|
| HLH_063        | <i>LYST</i>    | 1:235826382_TA>T     | Het | Splicing defect | NM_000081:exon54:<br>c.11268-5delT        | 0.24    | 0.51    | N/A  |                                      | NS   |
|                | <i>STXB2P2</i> | 19:7711219_G>A       | Het | Missense        | NM_001272034:exon16:<br>c.1474G>A;p.D492N | 0.00008 | 0       | 27.5 |                                      |      |
| HLH_087        | <i>LYST</i>    | 1:235950630_C>T      | Het | Missense        | NM_000081:exon14:<br>c.4732G>A;p.A1578T   | 0.0002  | 0       | 23.2 |                                      | NS   |
|                | <i>UNC13D</i>  | 17:73830182_C>T      | Het | Missense        | NM_199242:exon24:<br>c.2341G>A;p.V781I    | 0.001   | 0.001   | 2.4  |                                      |      |
| HLH_097        | <i>LYST</i>    | 1:235850245_C>A      | Het | Splicing defect | NM_000081:exon49:<br>c.10800+4G>T         | 0.007   | 0.006   | N/A  |                                      | NS   |
|                | <i>STX11</i>   | 6:144507773_C>A      | Het | Missense        | NM_003764:exon2:<br>c.9C>A;p.D3E          | 0.0002  | 0.00003 | 26.7 |                                      |      |
| HLH_104        | <i>LYST</i>    | 1:235826382_TA>T     | Het | Splicing defect | NM_000081:exon54:<br>c.11268-5delT        | 0.24    | 0.51    | N/A  | <i>IL16</i>                          | N/A  |
| HLH_107        | <i>STXB2P2</i> | 19:7704886_CTATG>C   | Het | Intronic        | N/A                                       | 0.01    | 0.006   | N/A  | <i>ERCC4,<br/>TREM2,<br/>or VMAC</i> | N/A  |
| <u>HLH_109</u> | <i>STX11</i>   | 6:144508353_G>A      | Het | Missense        | NM_003764:exon2:<br>c.589G>A;p.V197M      | 0.003   | 0.0004  | 24   | <i>RAG2</i>                          | N/A  |
| HLH_111        | <i>LYST</i>    | 1:235826382_TA>T     | Het | Splicing defect | NM_000081:exon54:<br>c.11268-5delT        | 0.24    | 0.51    | N/A  | <i>STAT2</i>                         | N/A  |
| HLH_113        | <i>LYST</i>    | 1:235826382_TA>T     | Het | Splicing defect | NM_000081:exon54:<br>c.11268-5delT        | 0.24    | 0.51    | N/A  | <i>PIK3CD</i>                        | N/A  |
| HLH_115        | <i>LYST</i>    | 1:235826382_TA>T     | Het | Splicing defect | NM_000081:exon54:<br>c.11268-5delT        | 0.24    | 0.51    | N/A  | <i>DOCK8</i>                         | N/A  |
| <u>HLH_116</u> | <i>LYST</i>    | 1:235826382_TA>T     | Het | Splicing defect | NM_000081:exon54:<br>c.11268-5delT        | 0.24    | 0.51    | N/A  | <i>RLTPR</i>                         | N/A  |
|                | <i>LYST</i>    | 1:235918688_CAAAAG>C | Het | Intronic        | N/A                                       | 0.001   | 0       | N/A  |                                      |      |
|                | <i>STX11</i>   | 6:144512671_T>TA     | Het | UTR3            | N/A                                       | 0.004   | 0       | N/A  |                                      |      |
|                | <i>PRF1</i>    | 10:72357599_TAAA>T   | Het | UTR3            | N/A                                       | 0.0002  | 0       | N/A  |                                      |      |
| HLH_117        | <i>LYST</i>    | 1:235955277_G>A      | Het | Missense        | NM_000081:exon12:<br>c.4265C>T;p.A1422V   | 0.0006  | 0.00008 | 21.6 | <i>RAG1</i>                          | 0.03 |
|                | <i>RAB27A</i>  | 15:55516136_G>C      | Het | Missense        | NM_183236:exon6:<br>c.418C>G;p.Q140E      | 0.0004  | 0.0003  | 10.6 |                                      |      |
| <u>HLH_121</u> | <i>LYST</i>    | 1:235826382_TA>T     | Het | Splicing defect | NM_000081:exon54:<br>c.11268-5delT        | 0.24    | 0.51    | N/A  | <i>NCF1</i>                          | N/A  |
| HLH_122        | <i>LYST</i>    | 1:235918688_C>AAAAG  | Het | Intronic        | N/A                                       | 0.002   | 0       | N/A  | <i>STAT3 &amp;<br/>NLRP4</i>         | N/A  |
|                | <i>STX11</i>   | 6:144512671_T>TA     | Het | UTR3            | N/A                                       | 0.004   | 0       | N/A  |                                      |      |
|                | <i>STXB2P2</i> | 19:7708058_C>T       | Het | Missense        | NM_001272034:exon13:<br>c.1067C>T;p.T356M | 0.00008 | 0.01    | 26.3 |                                      |      |

<sup>a</sup> Allelic frequency in the Baylor-Hopkins Center for Mendelian Genomics database

<sup>b</sup> Allelic frequency in the Exome Aggregation Consortium database

<sup>c</sup> Combined Annotation Dependent Depletion Phred score

<sup>d</sup> Genes containing likely disease-contributing variants in the subject

<sup>e</sup> Statistical significance in mutational burden/potential digenic inheritance analysis

Abbreviations: Het, heterozygous; Hom, homozygous; ID, identifier; N/A, not available or not applicable; NS, not significant; UTR3, untranslated 3' region

Underlined samples had chromosomal microarray testing performed.

**Table S3.** Bioinformatic mutational burden analyses of potential digenic fHLH variants.

| <b>Gene 1</b> | <b>Gene 2</b> | <b>Frequency of combination in HLH cohort</b> | <b>Frequency of combination in Baylor-Hopkins CMG</b> | <b>p</b> |
|---------------|---------------|-----------------------------------------------|-------------------------------------------------------|----------|
| <i>PRF1</i>   | <i>STX11</i>  | 0                                             | 0.004                                                 | 0.66     |
| <i>PRF1</i>   | <i>STXBP2</i> | 0                                             | 0.004                                                 | 0.68     |
| <i>PRF1</i>   | <i>LYST</i>   | 0.02                                          | 0.06                                                  | 0.89     |
| <i>PRF1</i>   | <i>UNC13D</i> | 0                                             | 0.01                                                  | 0.82     |
| <i>PRF1</i>   | <i>RAB27A</i> | 0                                             | 0.0007                                                | 0.57     |
| <i>STX11</i>  | <i>STXBP2</i> | 0                                             | 0.001                                                 | 0.59     |
| <i>STX11</i>  | <i>LYST</i>   | 0.02                                          | 0.02                                                  | 0.35     |
| <i>STX11</i>  | <i>UNC13D</i> | 0.02 (note: from clinical testing)            | 0.005                                                 | 0.03     |
| <i>STX11</i>  | <i>RAB27A</i> | 0                                             | 0.0003                                                | 0.55     |
| <i>STXBP2</i> | <i>LYST</i>   | 0.02                                          | 0.02                                                  | 0.52     |
| <i>STXBP2</i> | <i>UNC13D</i> | 0                                             | 0.005                                                 | 0.70     |
| <i>STXBP2</i> | <i>RAB27A</i> | 0                                             | 0.0008                                                | 0.56     |
| <i>LYST</i>   | <i>UNC13D</i> | 0.06                                          | 0.07                                                  | 0.56     |
| <i>LYST</i>   | <i>RAB27A</i> | 0.02                                          | 0.005                                                 | 0.03     |
| <i>UNC13D</i> | <i>RAB27A</i> | 0                                             | 0.001                                                 | 0.59     |



**Table S4.** Potential molecular diagnoses associated with HLH in 28 of 48 subjects evaluated by research whole exome sequencing analyses.

| ID      | Gene(s)        | Chromosomal coordinates (hg19) | Reference sequence and effect              | Zygoty | Consanguinity <sup>a</sup> | Inheritance <sup>b</sup> | Mutation type       | CMG <sup>c</sup> | ExAC <sup>d</sup> | MSC <sup>e</sup> | CADD <sup>f</sup> | Group <sup>g</sup> |
|---------|----------------|--------------------------------|--------------------------------------------|--------|----------------------------|--------------------------|---------------------|------------------|-------------------|------------------|-------------------|--------------------|
| HLH_024 | <i>RAB27A</i>  | 15:55520906_G>A                | NM_183236:exon5:<br>c.244C>T:p.R82C        | Hom    | 1                          | (P / M)                  | Missense            | 0.0001           | 0.000008          | 4.037            | 34                | 1                  |
|         | <i>RAD51C</i>  | 17:56772522_G>A                | NM_058216:exon2:<br>c.376G>A:p.A126T       | Hom    | 1                          | (P / M)                  | Missense            | 0.004            | 0.004             | 0.001            | 21.2              | -                  |
| HLH_112 | <i>WAS</i>     | X:48547298_C>T                 | NM_000377:exon10:<br>c.1181C>T:p.P394L     | Hemi   | 2                          | M                        | Missense            | 0.0003           | 0.0003            | 0.721            | 13.6              | 2A                 |
| HLH_120 | <i>TTC7A</i>   | 2:47233133_G>A                 | NM_001288953:exon10:<br>c.1036G>A:p.A346T  | Het    | 0                          | NT                       | Missense            | 0.0001           | 0.0002            | 0.001            | 0.177             | 2B                 |
|         | <i>TTC7A</i>   | 2:47251490_G>A                 | NM_001288953:exon15:<br>c.1531G>A:p.V511I  | Het    | 0                          | NT                       | Missense            | 0.0002           | 0.0002            | 0.001            | 10.63             | 2B                 |
|         | <i>LRBA</i>    | 4:151242409_T>G                | NM_006726:exon51:<br>c.7597A>C:p.T2533P    | Het    | 0                          | NT                       | Missense            | 0.005            | 0.005             | 32               | 7.889             | 2B                 |
|         | <i>LRBA</i>    | 4:151792519_G>A                | NM_006726:exon19:<br>c.2345C>T:p.T782I     | Het    | 0                          | NT                       | Missense            | 0.0001           | 0.000008          | 32               | 32                | 2B                 |
|         | <i>NLRP12</i>  | 19:54327394_C>T                | NM_144687:exon1:<br>c.35G>A:p.R12H         | Het    | 0                          | NT                       | Missense            | 0.0001           | 0.00006           | 23.6             | 23.7              | 3                  |
| HLH_115 | <i>DOCK8</i>   | 9:(24850-379936)x0             | -                                          | Hom    | 1                          | P / M                    | Deletion            | N/A              | N/A               | 0.001            | N/A               | 2A                 |
| HLH_116 | <i>CARMIL2</i> | 16:67681977_G>A                | NM_001013838:exon14:<br>c.1094G>A:p.R365H  | Het    | 0                          | P                        | Missense            | 0.0002           | 0.00005           | 3.313            | 21.5              | 2B                 |
|         | <i>CARMIL2</i> | 16:67688564_A>T                | NM_001013838:exon31:<br>c.3551A>T:p.E1184V | Het    | 0                          | M                        | Missense            | 0.0006           | 0.0008            | 3.313            | 26.5              | 2B                 |
|         | <i>CLEC18B</i> | 16:74446946_C>G                | NM_001011880:exon5:<br>c.665G>C:p.G222A    | Het    | 0                          | M                        | Missense            | 0.0002           | 0.000008          | 3.313            | 23.9              | -                  |
|         | <i>CLEC18B</i> | 16:74446997_G>A                | NM_001011880:exon5:<br>c.614C>T:p.S205L    | Het    | 0                          | P                        | Missense            | 0.0002           | 0.00007           | 3.313            | 28.4              | -                  |
| HLH_117 | <i>RAG1</i>    | 11:36596065_G>A                | NM_000448:exon2:<br>c.1211G>A:p.R404Q      | Hom    | 1                          | (P / M)                  | Missense            | 0.0002           | 0.000008          | 1.118            | 29.4              | 2A                 |
| HLH_109 | <i>RAG2</i>    | 11:36614905_C>T                | NM_001243786:exon3:<br>c.814G>A:p.V272I    | Het    | 2                          | Not M                    | Missense            | 0.0001           | 0.0002            | 0.001            | 3.491             | 2A                 |
|         | <i>RAG2</i>    | 11:36615697_C>T                | NM_001243786:exon3:<br>c.22G>A:p.V8I       | Het    | 2                          | M                        | Missense            | 0.004            | 0.003             | 0.001            | 20.2              | 2A                 |
| HLH_114 | <i>CYBB</i>    | X:37668913_GA>G                | NM_000397:exon12:<br>c.1556delA:p.E519fs   | Hemi   | 0                          | NT                       | Frameshift deletion | 0.0001           | 0                 | 0.001            | N/A               | 2A                 |
|         | <i>DOCK11</i>  | X:117796732_A>T                | NM_144658:exon45:<br>c.5053A>T:p.M1685L    | Hemi   | 0                          | NT                       | Missense            | 0.0001           | 0.00001           | 3.313            | 21.6              | -                  |
| HLH_121 | <i>NCF1</i>    | 7:74197326_A>G                 | NM_000265:exon6:<br>c.496A>G:p.N166D       | Hom    | 2                          | (P / M)                  | Missense            | 0.001            | 0.0008            | 0.001            | 0.003             | 2A                 |
|         | <i>NLRP12</i>  | 19:54327368_C>T                | NM_144687:exon1:<br>c.61G>A:p.E21K         | Het    | 2                          | NT                       | Missense            | 0.0001           | 0.00004           | 23.6             | 24.1              | 3                  |
| HLH_118 | <i>STAT1</i>   | 2:191844538_C>T                | NM_139266:exon20:<br>c.1687G>A:p.E563K     | Het    | 0                          | DN                       | Missense            | 0.0001           | 0                 | 7.736            | 24.1              | 2A                 |
| HLH_111 | <i>STAT2</i>   | 12:56750224_C>T                | NM_198332:exon3:                           | Hom    | 1                          | (P) / M                  | Splicing defect     | 0.0002           | 0                 | 3.313            | 28.3              | 2A                 |

|         |                |                 |                                         |     |   |         |                 |         |          |       |       |    |
|---------|----------------|-----------------|-----------------------------------------|-----|---|---------|-----------------|---------|----------|-------|-------|----|
|         |                |                 | c.131+1G>A                              |     |   |         |                 |         |          |       |       |    |
| HLH_122 | <i>STAT3</i>   | 17:40486008_T>C | NM_213662:exon9:<br>c.857A>G;p.E286G    | Het | 0 | DN      | Missense        | 0.0001  | 0        | 15.29 | 26.4  | 2A |
|         | <i>NLRP4</i>   | 19:56369040_G>C | NM_134444:exon3:<br>c.281G>C;p.G94A     | Hom | 0 | P / M   | Missense        | 0.002   | 0.003    | 3.313 | 0.154 | 3  |
| HLH_113 | <i>PIK3CD</i>  | 1:9781572_G>A   | NM_005026:exon15:<br>c.1882G>A;p.E628K  | Het | 0 | NT      | Missense        | 0.0001  | 0        | 23.8  | 25.1  | 2B |
| HLH_110 | <i>MCM3AP</i>  | 21:47699982_T>C | NM_003906:exon4:<br>c.1592A>G;p.E531G   | Het | 0 | P       | Missense        | 0.0004  | 0.0007   | 3.313 | 22.8  | 2B |
|         | <i>MCM3AP</i>  | 21:47704306_G>C | NM_003906:exon1:<br>c.895C>G;p.R299G    | Het | 0 | M       | Missense        | 0.0001  | 0        | 3.313 | 22.4  | 2B |
|         | <i>MCM9</i>    | 6:119137445_C>A | NM_017696:exon12:<br>c.1974G>T;p.Q658H  | Het | 0 | M       | Missense        | 0.008   | 0.008    | 0.001 | 24.1  | 2B |
|         | <i>MCM9</i>    | 6:119234579_T>C | NM_017696:exon5:<br>c.911A>G;p.N304S    | Het | 0 | P       | Missense        | 0.007   | 0.003    | 0.001 | 26.4  | 2B |
| HLH_119 | <i>CASP10</i>  | 2:202074287_T>C | NM_032977:exon9:<br>c.1415+2T>C         | Het | 0 | DN      | Splicing defect | 0.0001  | 0.00003  | 0.001 | 23.7  | 2A |
|         | <i>HAVCR2</i>  | 5:156533787_T>C | NM_032782:exon2:<br>c.245A>G;p.Y82C     | Hom | 0 | P / (M) | Missense        | 0.003   | 0.004    | 3.313 | 24    | -  |
| HLH_002 | <i>NLR4</i>    | 2:32476322_C>T  | NM_001199139:exon4:<br>c.611G>A;p.R204H | Het | 2 | NT      | Missense        | 0.0001  | 0.00005  | 12.26 | 4.759 | 3  |
| HLH_003 | <i>NLR4</i>    | 2:32476073_A>G  | NM_001199139:exon4:<br>c.860T>C;p.I287T | Het | 2 | DN      | Missense        | 0.0002  | 0        | 12.26 | 23.2  | 3  |
| HLH_006 | <i>NLRP12</i>  | 19:54310804_C>G | NM_144687:exon4:<br>c.2188G>C;p.V730L   | Het | 0 | NT      | Missense        | 0.0001  | 0.000008 | 23.6  | 21    | 3  |
| HLH_005 | <i>NLRP4</i>   | 19:56369244_C>T | NM_134444:exon3:<br>c.485C>T;p.T162M    | Het | 0 | P       | Missense        | 0.004   | 0.005    | 3.313 | 25.5  | 3  |
|         | <i>NLRP4</i>   | 19:56388513_T>C | NM_134444:exon8:<br>c.2677T>C;p.C893R   | Het | 0 | M       | Missense        | 0.0002  | 0        | 3.313 | 23.6  | 3  |
|         | <i>TNFRSF4</i> | 1:1147210_G>A   | NM_003327:exon6:<br>c.637C>T;p.R213C    | Het | 0 | DN      | Missense        | 0.0001  | 0        | 3.313 | 22.6  | -  |
|         | <i>PRKCI</i>   | 3:169998024_A>G | NM_002740:exon9:<br>c.A715G;p.T239A     | Het | 0 | DN      | Missense        | 0.00008 | 0.00002  | 5.744 | 10.81 | -  |
| HLH_008 | <i>NLRP4</i>   | 19:56370038_G>A | NM_134444:exon3:<br>c.1279G>A;p.A427T   | Het | 0 | NT      | Missense        | 0.005   | 0.004    | 3.313 | 1.29  | 3  |
|         | <i>NLRP4</i>   | 19:56370230_G>A | NM_134444:exon3:<br>c.1471G>A;p.A491T   | Het | 0 | NT      | Missense        | 0.0005  | 0.0007   | 3.313 | 0.005 | 3  |
|         | <i>IRF2BP2</i> | 1:234743113_G>A | NM_182972:exon2:<br>c.1534C>T;p.R512W   | Het | 0 | NT      | Missense        | 0.0001  | 0        | 3.313 | 32    | -  |
| HLH_004 | <i>NLR3</i>    | 16:3613295_T>C  | NM_178844:exon5:<br>c.1643A>G;p.E548G   | Het | 0 | M       | Missense        | 0.002   | 0.002    | 3.313 | 0.337 | 3  |
|         | <i>NLR3</i>    | 16:3614541_G>A  | NM_178844:exon5:<br>c.397C>T;p.R133W    | Het | 0 | P       | Missense        | 0.0002  | 0.00007  | 3.313 | 27.8  | 3  |
| HLH_001 | <i>NLRP13</i>  | 19:56410233_C>T | NM_176810:exon10:<br>c.2860G>A;p.V954M  | Het | 0 | NT      | Missense        | 0.0001  | 0.00007  | 3.313 | 2.101 | 3  |

|         |                |                                                                      |                                                     |      |   |         |                        |        |          |       |       |   |
|---------|----------------|----------------------------------------------------------------------|-----------------------------------------------------|------|---|---------|------------------------|--------|----------|-------|-------|---|
|         | <i>NLRP13</i>  | 19:56424008_C>T                                                      | NM_176810:exon5:<br>c.1175G>A;p.R392Q               | Het  | 0 | NT      | Missense               | 0.0002 | 0.0005   | 3.313 | 7.246 | 3 |
| HLH_007 | <i>NRAS</i>    | 1:115258748_C>T                                                      | NM_002524:exon2:<br>c.34G>A;p.G12S                  | Het  | 0 | DN      | Missense               | 0.0001 | 0        | 24.9  | 25.6  | 3 |
| HLH_104 | <i>IL16</i>    | 15:81571896_C>T                                                      | NM_001172128:exon8:<br>c.865-3C>T                   | Hom  | 1 | P / (M) | Splicing defect        | 0.002  | 0.002    | 3.313 | N/A   | 4 |
|         | <i>KIFC1</i>   | 6:33365944_G>C                                                       | NM_002263:exon2:<br>c.150+1G>C                      | Het  | 1 | M       | Splicing defect        | 0.0002 | 0        | 3.313 | 24.8  | - |
|         | <i>KIFC1</i>   | 6:33372764_C>T                                                       | NM_002263:exon7:<br>c.892C>T;p.R298W                | Het  | 1 | Not M   | Missense               | 0.0002 | 0.00002  | 3.313 | 34    | - |
| HLH_105 | <i>STAT4</i>   | 2:191899278_C>T                                                      | NM_003151:exon18:<br>c.1616G>A;p.C539Y              | Het  | 0 | NT      | Missense               | 0.0001 | 0.000008 | 3.313 | 31    | 4 |
|         | <i>GATA4</i>   | 8:11606426_A>G                                                       | NM_002052:exon3:<br>c.617-2A>G                      | Het  | 0 | NT      | Splicing defect        | 0.0001 | 0        | 0.001 | 24.3  | - |
| HLH_106 | <i>ARHGEF6</i> | X:135750306_C>A                                                      | NM_004840:exon22:<br>c.2213G>T;p.C738F              | Hemi | 0 | NT      | Missense               | 0.0001 | 0.00001  | 3.313 | 23    | 4 |
|         | <i>PLCG2</i>   | 16:81973606_G>A                                                      | NM_002661:exon30:<br>c.3423G>A;p.M1141I             | Het  | 0 | NT      | Missense               | 0.0001 | 0.00002  | 3.313 | 23.6  | 4 |
|         | <i>AZU1</i>    | 19:830804_G>A                                                        | NM_001700:exon4:<br>c.457G>A;p.G153S                | Hom  | 0 | NT      | Missense               | 0.0002 | 0.00007  | 3.313 | 26.2  | - |
| HLH_107 | <i>G3BP1</i>   | 5:151179538_C>T                                                      | NM_005754:exon9:<br>c.932C>T;p.P311L                | Hom  | 1 | P / M   | Missense               | 0.0003 | 0        | 4.363 | 26.2  | 4 |
|         | <i>ERCC4</i>   | 16:14029418_TTTCCG<br>GAATCCTGAAAGAAC<br>CCCTCACTATCATCCA<br>TCCGC>T | NM_005236:exon8:<br>c.1630_1669del:<br>p.544_557del | Het  | 1 | P       | Frameshift<br>deletion | 0.0002 | 0        | 0.001 | N/A   | 4 |
|         | <i>ERCC4</i>   | 16:14041570_T>C                                                      | NM_005236:exon11:<br>c.2117T>C;p.I706T              | Het  | 1 | M       | Missense               | 0.002  | 0.001    | 0.001 | 26.9  | 4 |
|         | <i>TREM2</i>   | 6:41127543_G>A                                                       | NM_001271821:exon3:<br>c.469C>T;p.H157Y             | Hom  | 1 | P / M   | Missense               | 0.005  | 0.004    | 0.001 | 23.1  | 4 |
|         | <i>TSPAN6</i>  | X:99888957_T>G                                                       | NM_003270:exon4:<br>c.421A>C;p.S141R                | Hemi | 1 | DN      | Missense               | 0.0001 | 0        | 5.380 | 20.5  | - |
| HLH_108 | <i>RASGRP3</i> | 2:33745018_C>A                                                       | NM_170672:exon6:<br>c.174-1C>A                      | Het  | 0 | M       | Splicing defect        | 0.0002 | 0        | 3.313 | 23.2  | 4 |
|         | <i>RASGRP3</i> | 2:33752240_G>A                                                       | NM_170672:exon11:<br>c.844G>A;p.G282S               | Het  | 0 | Not M   | Missense               | 0.009  | 0.009    | 3.313 | 24.4  | 4 |

<sup>a</sup> Known or suspected consanguinity: 0 – none, 1 – present, 2 – potential distant consanguinity

<sup>b</sup> Presence of variant in genomic DNA extracted from parent(s); designations in parentheses denote samples that could not be tested due to insufficient quantity or unavailability but predicted due to confirmed homozygosity

<sup>c</sup> Allelic frequency in the Baylor-Hopkins Center for Mendelian Genomics database

<sup>d</sup> Allelic frequency in the Exome Aggregation Consortium database

<sup>e</sup> Rockefeller University Mutations Significance Cutoff for CADD Phred score

<sup>f</sup> Combined Annotation Dependent Depletion Phred score

<sup>g</sup> Group classifications: 1 - familial HLH, 2 - primary immunodeficiency disease, 3 - dysregulated immune activation and proliferation, 4 - other gene candidates; A - likely, B - possible

Abbreviations: DN, *de novo*; Hemi, hemizygous; Het, heterozygous; Hom, homozygous; ID, identifier; M, maternal; N/A, not available; NT, not tested due to insufficiency/unavailability of sample(s); P, paternal

**Table S5. Genetic Findings and Kaplan-Meier Survival Estimates**

| <b>Genetic Category</b>        | <b>Total</b> | <b>Survivors (N)</b> | <b>Overall Survival Estimate</b> | <b>p</b>  | <b>p</b>  | <b>p</b>  | <b>p</b>  |
|--------------------------------|--------------|----------------------|----------------------------------|-----------|-----------|-----------|-----------|
| <b>fHLH</b>                    | 19           | 12                   | 54%                              | 0.49      | 0.48      | 0.81      | 0.30      |
| <b>PIDD Only</b>               | 11           | 7                    | 88%                              | 0.17      | 0.81      | 0.50      | Reference |
| <b>DIAP Only</b>               | 8            | 5                    | 67%                              | 0.44      | 0.60      | Reference |           |
| <b>Other Candidate Defects</b> | 5            | 3                    | 67%                              | 0.38      | Reference |           |           |
| <b>No Genetic Explanation</b>  | 76           | 41                   | 47%                              | Reference |           |           |           |

Abbreviations: DIAP, dysregulated immune activation or proliferation; fHLH, familial HLH; PIDD, primary immunodeficiency disease.

**Table S6. Clinical and Genetic Features by Associated Trigger**

| Associated Trigger           | Total | Overall Survivors (N) | 1-Year Survival Estimate <sup>a</sup> | 3-Year Survival Estimate <sup>a</sup> | Overall Survival Estimate <sup>a</sup> | <i>p</i> (Overall Survival Estimate <sup>a</sup> ) | <i>p</i> (Overall Survival Estimate <sup>a</sup> ) | <i>p</i> (Overall Survival Estimate <sup>a</sup> ) | Maximum Level of Therapy                                                                                          | Genetic Profile                                                                                                                |
|------------------------------|-------|-----------------------|---------------------------------------|---------------------------------------|----------------------------------------|----------------------------------------------------|----------------------------------------------------|----------------------------------------------------|-------------------------------------------------------------------------------------------------------------------|--------------------------------------------------------------------------------------------------------------------------------|
| <b>Autoimmune</b>            | 32    | 23                    | 75%                                   | 69%                                   | 69%                                    | 0.58                                               | 0.13                                               | 0.13                                               | Observation/None: 3.1%<br>Biologics/Steroids: 31.3%*<br>Immunochemotherapy: 53.1%<br>HSCT: 12.5%*                 | fHLH: 0.0%*<br>PIDD: 3.1%<br>DIAP: 15.6%<br>PIDD/DIAP: 3.1%<br>Other Candidate Defects: 0.0%<br>No Genetic Explanation: 78.1%* |
| <b>Infection</b>             | 44    | 23                    | 52%                                   | 49%                                   | 44%                                    | 0.02                                               | 0.70                                               | Reference                                          | Observation/None: 11.4%<br>Biologics/Steroids: 13.6%<br>Immunochemotherapy: 36.4%<br>HSCT: 34.1%<br>Unknown: 4.6% | fHLH: 15.9%<br>PIDD: 11.4%<br>DIAP: 0.0%<br>PIDD/DIAP: 2.3%<br>Other Candidate Defects: 4.6%<br>No Genetic Explanation: 65.9%  |
| <b>Malignancy</b>            | 14    | 6                     | 44%                                   | 44%                                   | 44%                                    | 0.02                                               | Reference                                          |                                                    | Observation/None: 7.1%<br>Biologics/Steroids: 0.0%<br>Immunochemotherapy: 78.6%*<br>HSCT: 7.1%*<br>Unknown: 7.1%  | fHLH: 7.1%<br>PIDD: 7.1%<br>DIAP: 7.1%<br>PIDD/DIAP: 0.0%<br>Other Candidate Defects: 14.3%<br>No Genetic Explanation: 64.3%   |
| <b>No Associated Trigger</b> | 32    | 25                    | 93%                                   | 78%                                   | 58%                                    | Reference                                          |                                                    |                                                    | Observation/None: 6.3%<br>Biologics/Steroids: 6.3%<br>Immunochemotherapy: 31.3%<br>HSCT: 56.3%<br>Unknown: 0.0%   | fHLH: 34.4%<br>PIDD: 12.5%<br>DIAP: 6.3%<br>PIDD/DIAP: 3.1%<br>Other Candidate Defects: 3.1%<br>No Genetic Explanation: 40.6%  |

Abbreviations: DIAP, dysregulated immune activation or proliferation; fHLH, familial HLH; HSCT, hematopoietic stem cell transplantation; PIDD, primary immunodeficiency disease.

<sup>a</sup> By Kaplan-Meier analysis

\* Significantly different compared to No Associated Trigger group ( $p < 0.05$ )

## Supplemental Figures

**Figure S1. Summary of workflow and genetic findings for 101 subjects who met the HLH-2004 criteria and received genetic testing.** Abbreviations: DIAP, dysregulated immune activation or proliferation; fHLH, familial hemophagocytic lymphohistiocytosis; PIDD, primary immunodeficiency disease.

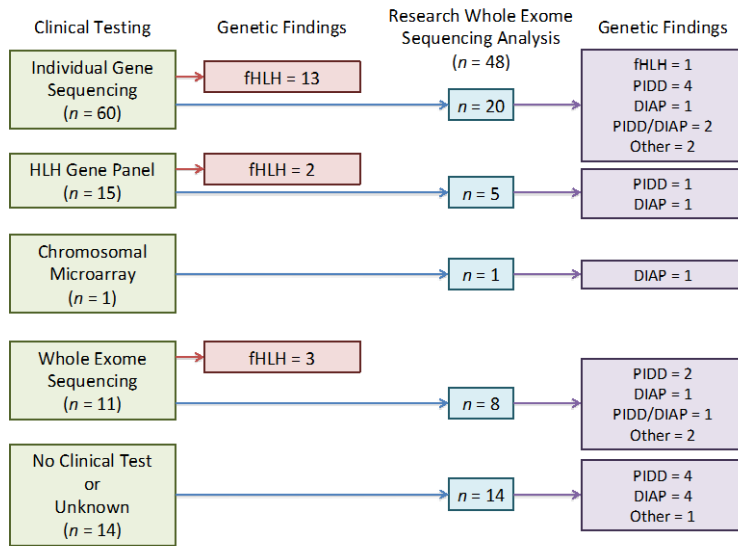

**Figure S2. Outcome data (Kaplan-Meier survival curves) for subjects in the earliest (blue) and latest (red) quartiles as determined by date of HLH diagnosis.** (A) Overall survival estimates from HLH diagnosis to date of death or last contact in years for the earliest and latest quartiles for all subjects enrolled ( $p = 0.57$ ). (B) Among subjects who received HSCT, overall survival estimates from HLH diagnosis to date of death or last contact in years for the earliest and latest quartiles ( $p = 0.76$ ). Abbreviation: HSCT, hematopoietic stem cell transplantation.

**A**

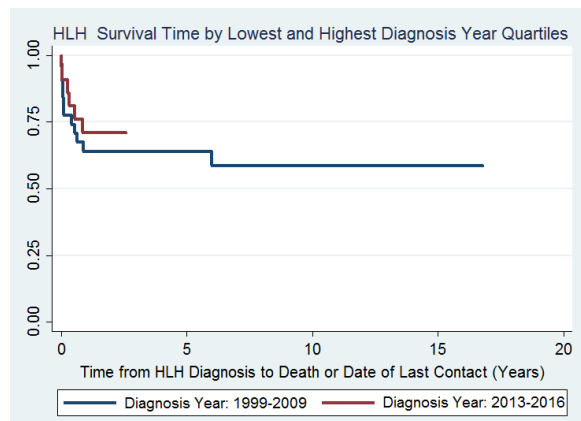

**B**

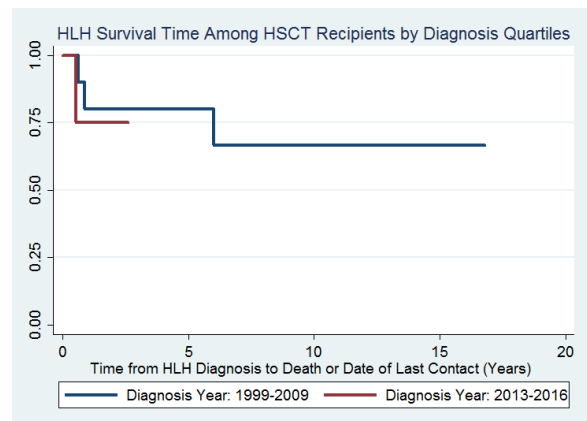

## References:

1. Bainbridge MN, Wang M, Wu Y, et al. Targeted enrichment beyond the consensus coding DNA sequence exome reveals exons with higher variant densities. *Genome Biology* 2011;12:R68.
2. Challis D, Yu J, Evani US, et al. An integrative variant analysis suite for whole exome next-generation sequencing data. *BMC Bioinformatics* 2012;13:8.
3. Reid JG, Carroll A, Veeraraghavan N, et al. Launching genomics into the cloud: deployment of Mercury, a next generation sequence analysis pipeline. *BMC Bioinformatics* 2014;15:30.
4. Hamosh A, Sobreira N, Hoover-Fong J, et al. PhenoDB: A New Web-Based Tool for the Collection, Storage, and Analysis of Phenotypic Features. *Human Mutation* 2013;34:566-71.
5. Henter J-I, Horne A, Aricó M, et al. HLH-2004: Diagnostic and therapeutic guidelines for hemophagocytic lymphohistiocytosis. *Pediatric Blood & Cancer* 2007;48:124-31.
